# Supplementary material for: C-Reactive Protein Levels and Cognitive Decline following Acute Ischemic Stroke: A Systematic Review and Meta-Analysis
Source: MDPI journal article supplement (doi:10.3390/brainsci13071082), 2023-07-17

# C-reactive protein levels and cognitive decline after acute ischemic stroke: An Systematic Review and Meta-analysis Supplementary

## Content to the manuscript

### Contents of Supplementary Content

|                             |                                                                        |
|-----------------------------|------------------------------------------------------------------------|
| Supplementary<br>Content S1 | Search strategy and results                                            |
| Supplementary<br>Content S2 | Methodological quality of cohort studies included in the meta-analysis |
| Supplementary<br>Content S3 | Forest maps of subgroups                                               |

## Supplementary Content S1

### Search strategy and results

#### Number of citations by each database

| Databases and Trial registers: | Citations   |
|--------------------------------|-------------|
| <b>Databases:</b>              |             |
| PubMed                         | 1523        |
| Cochrane                       | 641         |
| Embase                         | 2075        |
| Web of Science                 | 600         |
| <b>Total (databases)</b>       | <b>4839</b> |

## Full search strategy for each database

### PubMed

- #1 ((Cerebrovascular Disorders [MeSH Major Topic]) OR (Hemiplegia [MeSH Major Topic])) OR (Paresis[MeSH Major Topic])
- #2 hemipleg\*[Title] OR hemipar\*[Title] OR paresis[Title] OR paretic[Title] OR stroke[Title] OR poststroke[Title] OR post?stroke[Title] OR cerebrovasc\*[Title] OR brain vasc\*[Title] OR cerebral vasc\*[Title] OR cva\*[Title] OR apoplex\*[Title] OR SAH[Title]
- #3 ((brain\*[Title] OR cerebr\*[Title] OR cerebell\*[Title] OR intracran\*[Title] OR intracerebral [Title]) AND ((isch\*emi\*[Title] OR infarct\*[Title] OR thrombo\*[Title] OR emboli\*[Title] OR occlus\*))[Title])
- #4 ((brain\*[Title] OR cerebr\*[Title] OR cerebell\*[Title] OR intracerebral [Title] OR intracranial [Title] OR subarachnoid) [Title]) AND ((haemorrhage\*[Title] OR hemorrhage\*[Title] OR haematoma\*[Title] OR hematoma\*[Title] OR bleed\*) [Title])
- #5 (((#1) OR (#2)) OR (#3)) OR (#4)
- #6 (Dementia [MeSH Major Topic]) OR (Cognition Disorders [MeSH Major Topic])
- #7 Agnosia [Title/Abstract] OR amnesia [Title/Abstract] OR confusion [Title/Abstract] OR inattention [Title/Abstract] OR Dementia [Title/Abstract]
- #8 ((cogniti\*[Title/Abstract] OR arous\*[Title/Abstract] OR orientat\*[Title/Abstract] OR attention\*[Title/Abstract] OR concentrat\*[Title/Abstract] OR memor\*[Title/Abstract] OR recall[Title/Abstract] OR percept\*[Title/Abstract] OR think\*[Title/Abstract] OR sequenc\*[Title/Abstract] OR algorithm\*[Title/Abstract] OR judg?ment\*[Title/Abstract])

OR awareness[Title/Abstract] OR problem solving[Title/Abstract] OR  
 generalization[Title/Abstract] OR transfer[Title/Abstract] OR  
 comprehension[Title/Abstract] OR learning[Title/Abstract] AND  
 (disorder\*[Title/Abstract] OR decline\*[Title/Abstract] OR dysfunction\*[Title/Abstract] OR  
 impair\*[Title/Abstract] OR deficit\*[Title/Abstract] OR ability\*[Title/Abstract] OR  
 problem\*[Title/Abstract])

#9 dysexecutive syndrome\*[Title/Abstract] OR mental process\*[Title/Abstract] OR  
 impulsive behavior\*[Title/Abstract] OR executive function\*[Title/Abstract]

#10 (((#6) OR (#7)) OR (#8)) OR (#9)

#11 Psd [Title/Abstract] OR psci [Title/Abstract]

#12 (#10) AND (#5)

#13 (#11) OR (#12)

#14 ((Cytokines [MeSH Major Topic]) OR (C-reactive protein [MeSH Major Topic]))

#15 Cytokine\* OR Inflammation\* OR Pro-inflammation\* or CRP or C-reactive protein or hs-CRP  
 or hsCRP

#16 (#14) OR (#15)

#17 ((#13) AND (#16))

#18 plasma or blood or serum

#19 ((#17) AND (#18))

## **Cochrane**

- #1 MeSH descriptor: [Cerebrovascular Disorders] explode all trees
- #2 MeSH descriptor: [Hemiplegia] explode all trees

- #3 MeSH descriptor: [Paresis] explode all trees
- #4 (hemipleg\* or hemipar\* or paresis or paretic or stroke or poststroke or post-stroke or cerebrovasc\* or brain vasc\* or cerebral vasc\* or cva\* or apoplex\* or SAH): ti
- #5 (hemipleg\* or hemipar\* or paresis or paretic or stroke or poststroke or post-stroke or cerebrovasc\* or brain vasc\* or cerebral vasc\* or cva\* or apoplex\* or SAH): ab
- #6 ((brain\* or cerebr\* or cerebell\* or intracerebral or intracranial or subarachnoid) near/5 (haemorrhage\* or hemorrhage\* or haematoma\* or hematoma\* or bleed\*)): ti
- #7 ((brain\* or cerebr\* or cerebell\* or intracerebral or intracranial or subarachnoid) near/5 (haemorrhage\* or hemorrhage\* or haematoma\* or hematoma\* or bleed\*)): ab
- #8 (((brain\* or cerebr\* or cerebell\* or intracran\* or intracerebral) near/5 (isch\*emi\* or infarct\* or thrombo\* or emboli\* or occlus\*)))): ti
- #9 (((brain\* or cerebr\* or cerebell\* or intracran\* or intracerebral) near/5 (isch\*emi\* or infarct\* or thrombo\* or emboli\* or occlus\*)))): ab
- #10 (((cogniti\* or arous\* or orientat\* or attention\* or concentrat\* or memor\* or recall or percept\* or think\* or sequenc\* or algorithm\* or judg?ment\* or awareness or problem solving or generali?ation or transfer or comprehension or learning) near/10 (disorder\* or declin\* or dysfunct\* or impair\* or deficit\* or abilit\* or problem\*)))):ti OR (((cogniti\* or arous\* or orientat\* or attention\* or concentrat\* or memor\* or recall or percept\* or think\* or sequenc\* or algorithm\* or judg?ment\* or awareness or problem solving or generali?ation or transfer or comprehension or learning) near/10 (disorder\* or declin\* or dysfunct\* or impair\* or deficit\* or abilit\* or problem\*)))):ab
- #11 ((dysexecutive syndrome\* or mental process\* or impulsive behavio?r\* or executive

function\*)):ti OR ((dysexecutive syndrome\* or mental process\* or impulsive  
behavior?r\* or executive function\*)):ab

#12 (Psd or psci): ti OR (Psd or psci): ab

#13 MeSH descriptor: [Cytokines] explode all trees

#14 MeSH descriptor: [C-reactive protein] explode all trees

#15 (CRP or C-reactive protein or hs-CRP or hsCRP): ti OR (CRP or C-reactive protein or hs-  
CRP or hsCRP): ab

#16 #1 OR #2 OR #3 OR #4 OR #5 OR #6

#17 10 OR #11

#18 #16 AND #17

#19 #18 OR #12

#20 #13 OR #14 OR #15

#21 #18 AND #20

#22 (plasma or blood or serum): ti AND (plasma or blood or serum): ab

#23 #21 AND #22

### **Embase**

#1 'cerebrovascular disease'/exp OR 'hemiplegia'/exp OR 'paresis'/exp

#2 hemipleg\*: ti OR hemipar\*: ti OR paresis: ti OR paretic: ti OR stroke: ti OR poststroke: ti  
OR post-stroke: ti OR cerebrovasc\*: ti OR 'brain vas\*': ti OR 'cerebral vas\*': ti OR cva\*:  
ti OR apoplex\*: ti OR sah: ti

#3 'cognitive defect'/exp OR 'dementia'/exp

#4 agnosia: ti OR amnesia: ti OR confusion: ti OR inattention: ti OR dementia: ti

- #5 psd: ti OR psci: ti
- #6 'cytokine'/exp OR 'creactive protein'/exp
- #7 cytokine\*: ab,ti OR inflammat\*: ab,ti OR 'pro inflammat\*': ab,ti OR 'tumor necrosis factor-alpha': ab,ti OR 'tumor necrosis factor- $\alpha$ ': ab,ti OR 'tnf alpha': ab,ti OR 'tnf  $\alpha$ ': ab,ti OR interleukin\*: ab,ti OR 'il 1\*': ab,ti OR 'il 2\*': ab,ti OR 'il 3\*': ab,ti OR 'il 4': ab,ti OR 'il 5': ab,ti OR 'il 6': ab,ti OR 'il 7': ab,ti OR 'il 8': ab,ti OR 'il 9': ab,ti OR crp: ab,ti OR 'c-reactive protein': ab,ti OR 'hs crp': ab,ti OR hscrp: ab,ti
- #8 plasma: ab,ti OR blood: ab,ti OR serum: ab,ti
- #9 #1 OR #2
- #10 #3 OR #4
- #11 #9 AND #10
- #12 #5 OR #11
- #13 #6 OR #7
- #14 #8 AND #12 AND #13

### **Web of Science**

- #1 TI=(Cerebrovascular Disorders or Hemiplegia or Paresis or hemipleg\* or hemipar\* or paresis or paretic or stroke or poststroke or post-stroke or cerebrovasc\* or brain vascul\* or cerebral vascul\* or cva\* or apoplex\* or SAH)
- #2 TI=((brain\* or cerebr\* or cerebell\* or intracran\* or intracerebral) and (isch\*emi\* or infarct\* or thrombo\* or emboli\* or occlus\*)) OR TI= ((brain\* or cerebr\* or cerebell\* or intracerebral or intracranial or subarachnoid) and (haemorrhage\* or hemorrhage\* or haematoma\* or hematoma\* or bleed\*))

- #3 TI = (Cognition Disorders or Dementia) OR AB = (Cognition Disorders or Dementia)
- #4 TI = (agnosia or amnesia or confusion or inattention or Dementia) OR AB = (agnosia or amnesia or confusion or inattention or Dementia)
- #5 TI=((cogniti\* or arous\* or orientat\* or attention\* or concentrat\* or memor\* or recall or percept\* or think\* or sequenc\* or algorithm\* or judg?ment\* or awareness or problem solving or generali?ation or transfer or comprehension or learning) AND (disorder\* or declin\* or dysfunct\* or impair\* or deficit\* or abilit\* or problem\*)) OR AB=((cogniti\* or arous\* or orientat\* or attention\* r concentrat\* or memor\* or recall or percept\* or think\* or sequenc\* or algorithm\* or judg?ment\* or awareness or problem solving or generali?ation or transfer or comprehension or learning) AND (disorder\* or declin\* or dysfunct\* or impair\* or deficit\* or abilit\* or problem\*))
- TI = (dysexecutive syndrome\* or mental process\* or impulsive behavio?r\* or executive function\*) OR AB=(dysexecutive syndrome\* or mental process\* or impulsive behavio?r\* or executive function\*)
- #6
- #7 TI = (Psd or psci) OR AB = (Psd or psci)
- #8 AB = (Cytokines or C-reactive protein) OR TI = (Cytokines or C-reactive protein)
- #9 TI = (Cytokine\* OR Inflamm\* OR Pro-inflamm\* OR Tumor Necrosis Factor-alpha OR Tumor Necrosis Factor- $\alpha$  OR TNF-alpha OR TNF- $\alpha$ OR interleukin\* OR il-1\* OR il-2\* OR il-3\* OR il-4 OR il-5 OR il-6 OR il-7 OR il-8 OR il-9 OR CRP or C-reactive protein or hs-CRP or hsCRP) OR AB = (Cytokine\* OR Inflamm\* OR Pro-inflamm\* OR Tumor Necrosis Factor-alpha OR Tumor Necrosis Factor- $\alpha$  OR TNF-alpha OR TNF- $\alpha$ OR interleukin\* OR il-1\* OR il-2\* OR il-3\* OR il-4 OR il-5 OR il-6 OR il-7 OR il-8 OR il-9

OR CRP or C-reactive protein or hs-CRP or hsCRP)

#10 TI = (plasma or blood or serum) OR AB = (plasm or blood or serum)

#11 #2 OR #1

#12 #6 OR #5 OR #4 OR #3

#13 #12 AND #11

#14 #13 OR #7

#15 #9 OR #8

#16 #15 AND #14 AND #10



Supplementary Content S2

Methodological quality of cohort studies included in the meta-analysis

| Study ID             | Representative | Selection of  | Confirm  | Outcome of     | Control for          | Outcome    | Follow-up         | Adequacy       | Total   |
|----------------------|----------------|---------------|----------|----------------|----------------------|------------|-------------------|----------------|---------|
|                      | of the exposed | the unexposed | the      | interest not   | important factor     | assessment | long enough for   | of follow      | quality |
|                      | group          | group         | exposure | present at the | or additional factor |            | outcomes to occur | up of cohorts4 | scores  |
|                      |                |               |          | start of study |                      |            |                   |                |         |
| Chen Zhu 2020        | ☆              | ☆             | ☆        | ☆              | ☆☆                   | ☆          | ☆                 | -              | 8       |
| Fang Ran 2020        | ☆              | ☆             | ☆        | ☆              | ☆☆                   | ☆          | -                 | ☆              | 8       |
| He Jia 2020          | ☆              | ☆             | ☆        | ☆              | ☆☆                   | ☆          | -                 | -              | 7       |
| Jian Guo 2018        | ☆              | ☆             | ☆        | ☆              | ☆☆                   | ☆          | ☆                 | ☆              | 9       |
| Le Hou 2019          | ☆              | ☆             | ☆        | ☆              | ☆☆                   | ☆          | -                 | ☆              | 8       |
| Lei Mao 2020         | ☆              | ☆             | ☆        | ☆              | ☆☆                   | ☆          | ☆                 | -              | 8       |
| M.L Alexandrova 2016 | ☆              | ☆             | ☆        | -              | ☆☆                   | ☆          | ☆                 | -              | 7       |
| Mingsi Zhang 2022    | ☆              | ☆             | ☆        | ☆              | ☆☆                   | ☆          | ☆                 | -              | 8       |
| ZhengbaoZhu 2019     | ☆              | ☆             | ☆        | ☆              | ☆☆                   | ☆          | -                 | ☆              | 8       |

## Supplementary Content S3

### Forest maps of subgroups

#### Forest map of scales for cognitive assessment

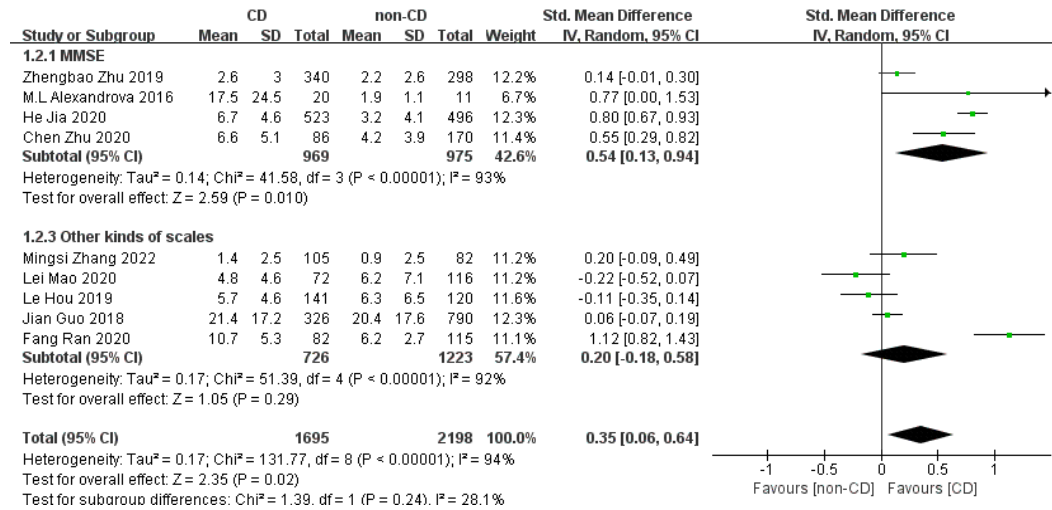

#### Forest map of detection sensitivity of CRP

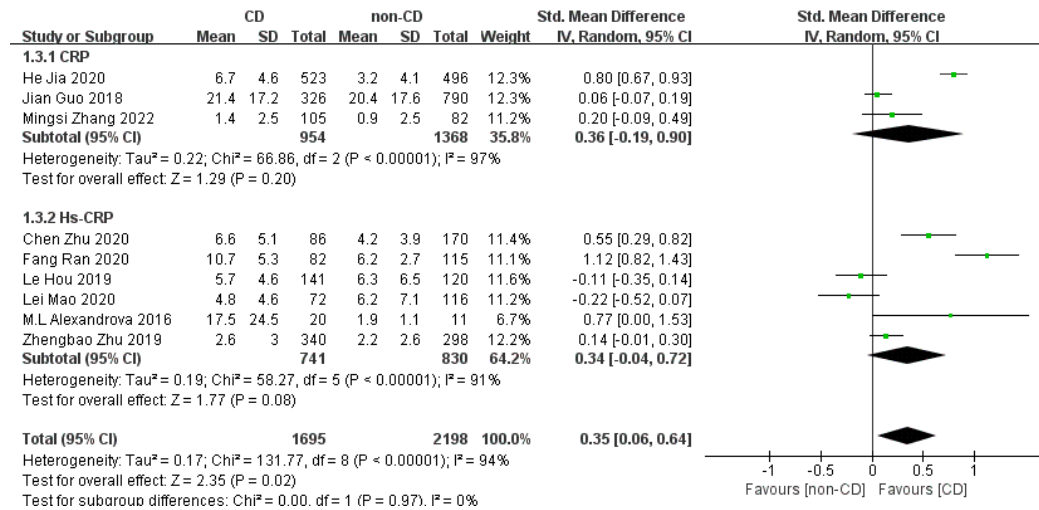

#### Forest map of research types

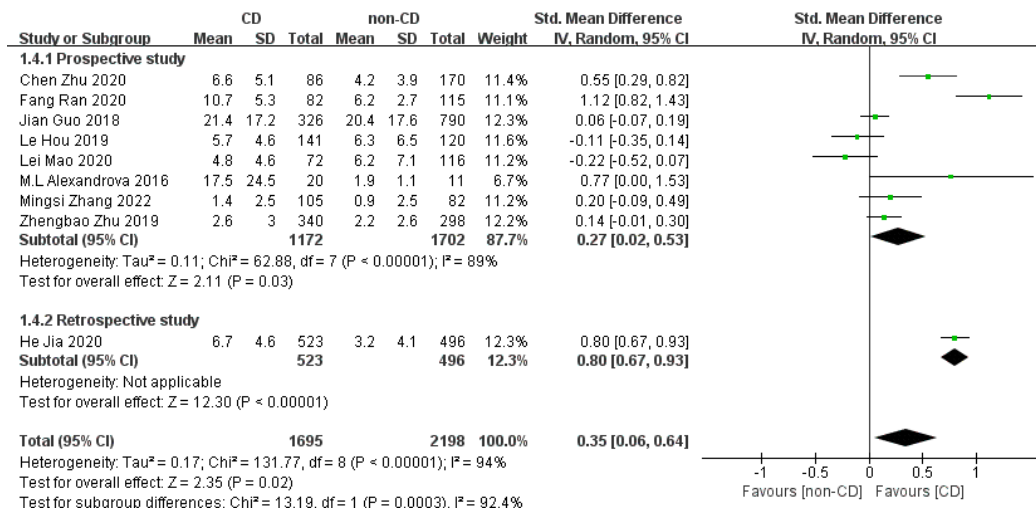

## Forest map of sample size

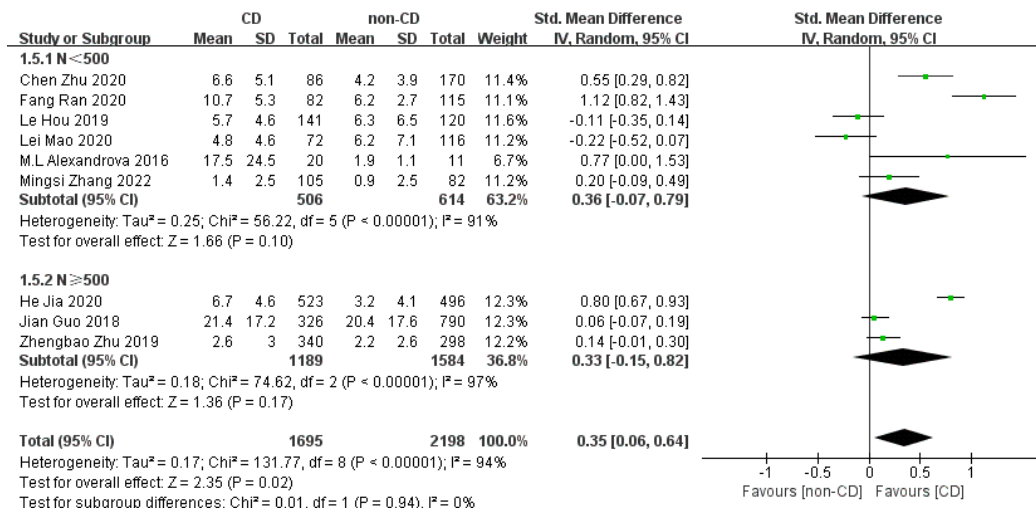

## Forest map of source of CRP

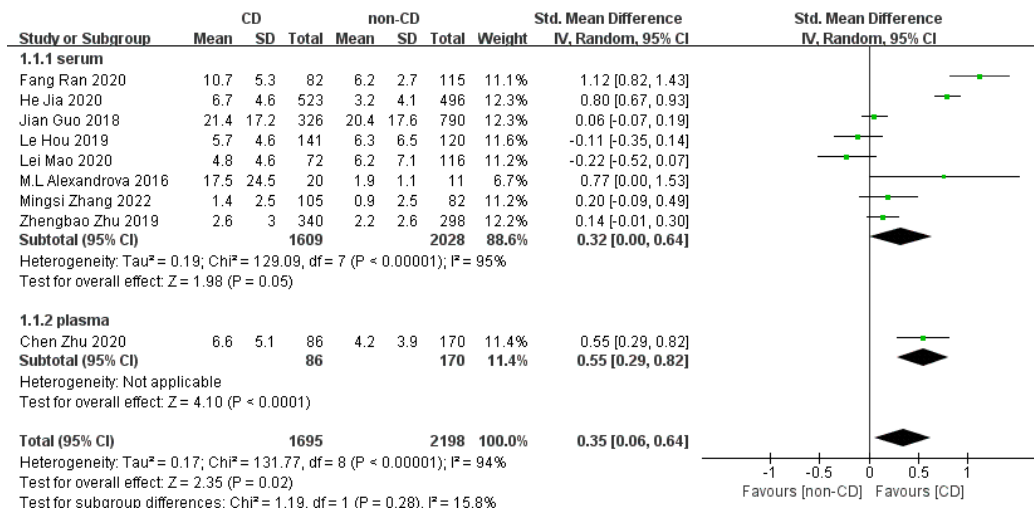

Supplement: s1 [file s1]
